# Supplementary material for: Ultrathin wide-angle large-area digital 3D holographic display using a non-periodic photon sieve
Source: PubMed Central journal article supplement (PMC6428928; doi:10.1038/s41467-019-09126-9), 2019-03-21
Supplement: 41467_2019_9126_MOESM3_ESM.pdf [file 41467_2019_9126_MOESM3_ESM.pdf]

## **Description of Additional Supplementary Files**

File Name: Supplementary Movie 1

Description: Dynamic holographic rotating cube with red, green, and blue colours. A total of 360 frames were captured and displayed at a frame rate of 30 Hz. A monochrome charge-coupled device with spectral filters was used to capture each colour frame. The frames were subsequently combined using the CIE 1931 table with normalized luminance.
